# Supplementary material for: Angiotensin II Moderately Decreases Plasmodium Infection and Experimental Cerebral Malaria in Mice
Source: PLoS One. 2015 Sep 16;10(9):e0138191. doi: 10.1371/journal.pone.0138191 (PMC4574105; doi:10.1371/journal.pone.0138191)
Supplement: S1 Table — (XLSX) [file pone.0138191.s001.xlsx]

## Sheet: Figure 1 A
Fig. 1A
% OF INFECTED ERYTHROCYTES RUPTURE
	Control 1	Ang 10^-4	Ang 10^-6	Ang 10^-8
sample 1	94.1719	91.0467	87.5837	90.54
sample 2	92.1448	92.736	90.7933	89.0196
sample 3	92.905	92.8205	92.3137	92.3982
sample 4	91.7225	91.2157	91.8914	92.3982
sample 5	91.5535	92.3137	94.1719	89.9487
sample 6	92.1448	91.5535	90.7933	90.7933
sample 7	93.2428	91.8069	93.0739	93.8341
sample 8	89.8642	89.6108	94.3409	89.1885
Average	92.2187	91.638	91.8703	91.0151
Std.Dev.	1.28608	1.05109	2.1955	1.71143
RATIO PARASITEMIA DAY1/DAY0
	day 0	day 1	Ratio
CONTROL	2.04	3.84	1.88235
Ang 10^-8	2.04	2.73	1.33824
Ang 10^-6	2.04	2	0.980392
Ang 10^-4	2.04	0.41	0.20098

## Sheet: Figure 1B
Fig. 1B
PARASITEMIA
Group	Mice #	Group1	Day 2	Day 4	Day 6	Day 7	Day 8
control	10	0	0.384615	3.87097	9.06516
control	11	0	0.47	1.75
control	12	0	0.537634	2.47148	7.56579
control	13	0	0.3367	1.44928	8.30189	9.39597	10.2719
control	14	0	0.746269	1.23457	8.867
control	15	0	0.606061	0.922509	7.82313	13.6076	6.68693
control	16	0	0.233645	1.68776	8.40336	15.625	15.4122
control	17	0	0.36	0.7	10.6472
Minipump	1	1	0.36	2.47525	8.70488	12.2186
Minipump	2	1	0.72	2.14067	12.2905	8.85417
Minipump	3	1	0.854701	1.85676	13.0233
Minipump	4	1	0.777202	1.84	19.1429	20.1389
Minipump	5	1	0.471698	1.98511	15.4054	9.5122	12.4654
Minipump	6	1	0.334448	1.34907	6.64653	7.36086	8.26211
Minipump	7	1	0.37594	2.83976	10.5541
Minipump	8	1	0.201613	1.33333	8.35322
Minipump	9	1	0.66	1	10
Average control			0.459366	1.76082	8.66764	12.8762	10.7903
Average Minipump			0.5284	1.86888	11.569	11.617	10.3637
Standard deviation control			0.165413	1.01174	1.0204	3.17827	4.38567
Standard deviation Minipump			0.229573	0.582088	3.88883	5.07845	2.97216
Standad error control			0.0584822	0.357704	0.385673	1.83498	2.53207
Standad error Minipump			0.0765242	0.194029	1.29628	2.27115	2.10163

## Sheet: Figure 1C
GROUP	mice#	Day 5	Day 7	Day 8	Day 9	Day 10	Day 11	Day 12
Control	1	2.9	12.8
Control	2	3.33	16.2
Control	3	4.8	13.2	29.1							Day 5	Day 7	Day 8	Day 9	Day 10	Day 11	Day 12
Control	4	4.8	17.4							Average Control	3.41571	13.05	29.1
Control	5	3.96	10.8							Average ANG100	3.008	6.048	9.99556	11.05	17.7	19.65	24.95
Control	6	2.16	16.7							Average ANG500	3.514	8.78818	12.316	8.06667	11.25	6.65	8.3
Control	7	4.95	10.5							Std dev Control	1.32989	2.7456
Control	8	5.75								Std dev ANG100	1.71595	2.76364	3.60856	2.94222	2.96985	2.89914	4.59619
Control	9	1.95	10.2							Std dev ANG500	1.89936	3.06051	6.34545	4.77109	8.27315	5.58614	10.0409
Control	10	4.06								Std error Control	0.355427	0.868236	0
Control	11	2.05	11.1							Std error ANG100	0.443057	0.87394	1.20285	1.47111	2.1	2.05	3.25
Control	12	2.49	11.6							Std error ANG500	0.490414	0.922779	2.00661	2.75459	5.85	3.95	7.1
Control	13	3.17
Control	14	1.45
ANG100	15	2.6	7.9	14.8
ANG100	16	4.2	4.8	8.56
ANG100	17	2.4	6.8	13.5
ANG100	18	3.2	6.3	10.1	10.2	15.6	17.6	28.2
ANG100	19	4.16	7.68	14.3
ANG100	20	3.4	8.2	9.9
ANG100	21	0.32	1.9	7.1	13.9
ANG100	22	1.98
ANG100	23	0.1	0.9	4.2	12.8
ANG100	24	3.52	9.5
ANG100	25	5.4
ANG100	26	2.39
ANG100	27	1.46	6.5	7.5	7.3	19.8	21.7	21.7
ANG100	28	3.52
ANG100	29	6.47
ANG500	39	4.5	11.2	27.96
ANG500	40	3.2	7.4	14.8
ANG500	41	1.45	2.1	3.3	2.8	5.4	2.7	1.2
ANG500	42	3		12.5
ANG500	43	1.8	4.2	9.2	9.3	17.1	10.6	15.4
ANG500	44	2.6	9.6	11.4
ANG500	30	3.73	10.5	9.5
ANG500	31	3.54	10.47
ANG500	32	2.73	11.2	11.5
ANG500	33	2.16	9.5	9.3
ANG500	34	1.56	9
ANG500	35	8.86
ANG500	36	5.48
ANG500	37	3.1	11.5	13.7	12.1
ANG500	38	5

## Sheet: Figures 2A and 2B
GROUP	group2	mice number	CM day	Sacrifice day
Control	0	1	6	7
Control	0	2	5	7
Control	0	3	6	8
Control	0	4	6	7
Control	0	5	6	7
Control	0	6	5	7
Control	0	7	6	7
Control	0	8	6	6
Control	0	9	6	7
Control	0	10	6	6
Control	0	11	7	7
Control	0	12	6	7
Control	0	13	6	6
Control	0	14	6	6
ANG100	1	15	7	9
ANG100	1	16	8	9
ANG100	1	17	8	9
ANG100	1	18	12	12
ANG100	1	19	7	9
ANG100	1	20	8	9
ANG100	1	21	9	9
ANG100	1	22	6	6
ANG100	1	23	10	10
ANG100	1	24	6	7
ANG100	1	25	5	6
ANG100	1	26	6	6
ANG100	1	27	12	12
ANG100	1	28	6	6
ANG100	1	29	6	6
ANG500	2	39	8	9
ANG500	2	40	8	9
ANG500	2	41	12	12
ANG500	2	42	7	8
ANG500	2	43	12	12
ANG500	2	44	6	8
ANG500	2	30	6	8
ANG500	2	31	6	7
ANG500	2	32	6	8
ANG500	2	33	6	7
ANG500	2	34	6	7
ANG500	2	35	5	5
ANG500	2	36	6	6
ANG500	2	37	7	9
ANG500	2	38	6	6

## Sheet: Figures 2F and 2G
GROUP	mice#	av size hemo	Hemorraghes/mm^2	SCORE AT DEATH			Fig. 2G	Fig. 2F
Control	1	57.6793	2.09181	5			av size hemo	Hemorraghes/mm^2
Control	2	59.4306	2.40558	5		Average Control	56.9929	1.55492
Control	3	42.4118	1.60372	3		Average ANG100	49.6665	0.823634
Control	4	33.5321	1.00233	5		Average ANG500	64.2095	0.908624
Control	5	52.9808	2.35841	4		Std dev Control	13.0978	0.823631
Control	6	36.1093	3.40791	4		Std dev ANG100	18.3584	0.46904
Control	7	61.7754	1.10532	5		Std dev ANG500	44.5393	0.563192
Control	8	59.6285	2.10751	5
Control	9	83.8776	1.04515	5
Control	10	63.2344	0.713755	5
Control	11	69.6739	0.890549	5
Control	12	60.7142	0.370028	4
Control	13	54.0552	1.30506	4
Control	14	62.7974	1.36178	5
ANG100	15	51.5076	1.52735	4
ANG100	16	81.176	0.348635	4
ANG100	17	42.7124	1.87101	4
ANG100	18	24.7478	0.40093
ANG100	19	84.1502	0.320744	5
ANG100	20	40.6088	0.962232	4
ANG100	21	36.4089	0.461681	5
ANG100	22	63.4352	0.639422	5
ANG100	23	71.2619	1.04334	5
ANG100	24	43.0078	0.89906	4
ANG100	25	34.4297	0.904215	4
ANG100	26	36.6029	1.38785	5
ANG100	27	38.4355	0.585909
ANG100	28	61.9089	0.539752	5
ANG100	29	34.6045	0.462372	4
ANG500	39	47.1525	0.641488	5
ANG500	40	216.093	0.763677	5
ANG500	41	83.7199	0.267287
ANG500	42	75.561	0.641488	4
ANG500	44	65.2977	0.364482
ANG500	43	53.9373	1.60372	4
ANG500	30	62.1535	1.72414	5
ANG500	31	37.9305	0.687285	4
ANG500	32	50.9001	1.67312	4
ANG500	33	58.7714	1.71348	5
ANG500	34	54.938	1.03791	5
ANG500	35	37.7511	0.280899	5
ANG500	36	40.0653	0.525931	3
ANG500	37	51.661	1.38909	4
ANG500	38	27.2109	0.315371	3
